# Supplementary material for: Electron transport characteristics of organic molecule encapsulated carbon nanotubes
Source: Royal Society of Chemistry journal article supplement (doi:10.1039/c0nr00757a), 2011-01-01
Supplement: c0nr00757a.pdf [file c0nr00757a.pdf]

**Supporting Information**

**Electron Transport Characteristics of Organic Molecule  
Encapsulated Carbon Nanotubes**

*Sang Uck Lee\**, *Rodion V. Belosludov*, *Hiroshi Mizuseki*, and *Yoshiyuki Kawazoe*

Institute for Materials Research, Tohoku University, Sendai, 980-8577, Japan

E-mail: [sulee@imr.edu](mailto:sulee@imr.edu)

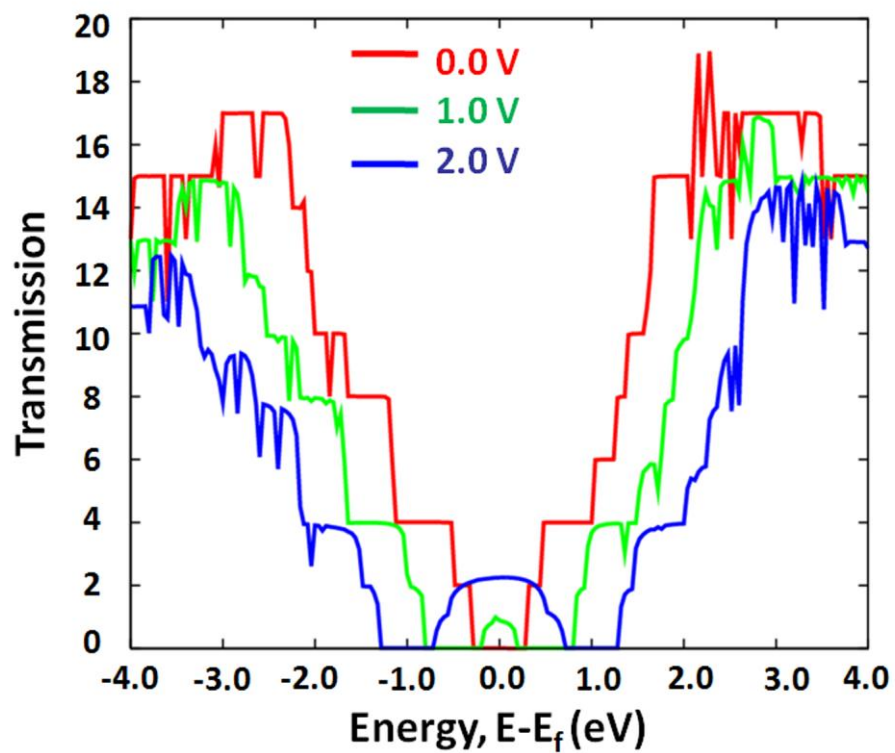

**Figure S1.** The transmission curves of CNT(17,0) under 0.0, 1.0 and 2.0 V.

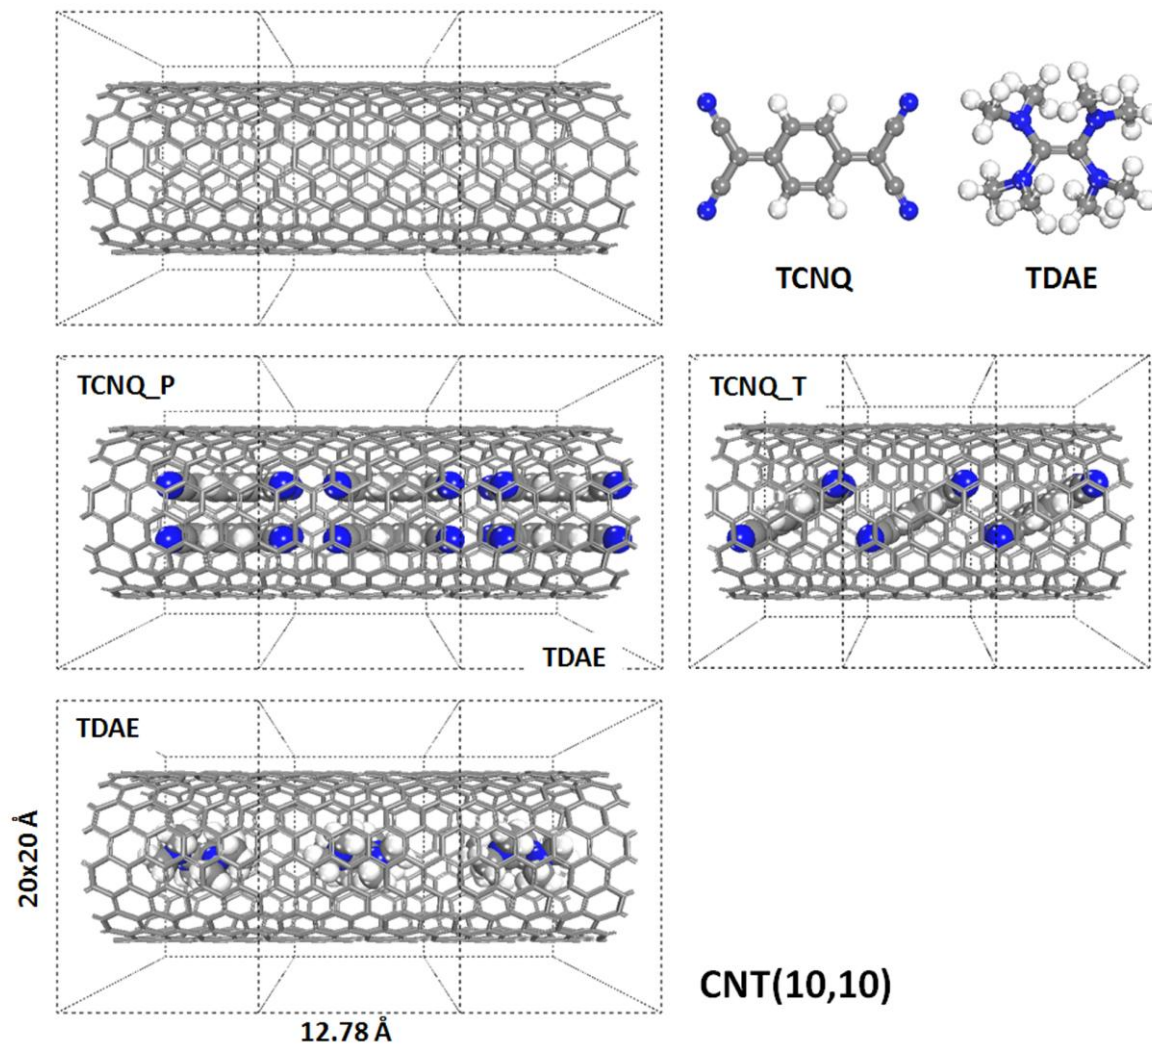

**Figure S2.** Schematic of (a) TCNQ or (b) TDAE encapsulated carbon nanotubes (10,10). In the case of TCNQ molecule, parallel(P) and tilted(T) stacking patterns are considered.

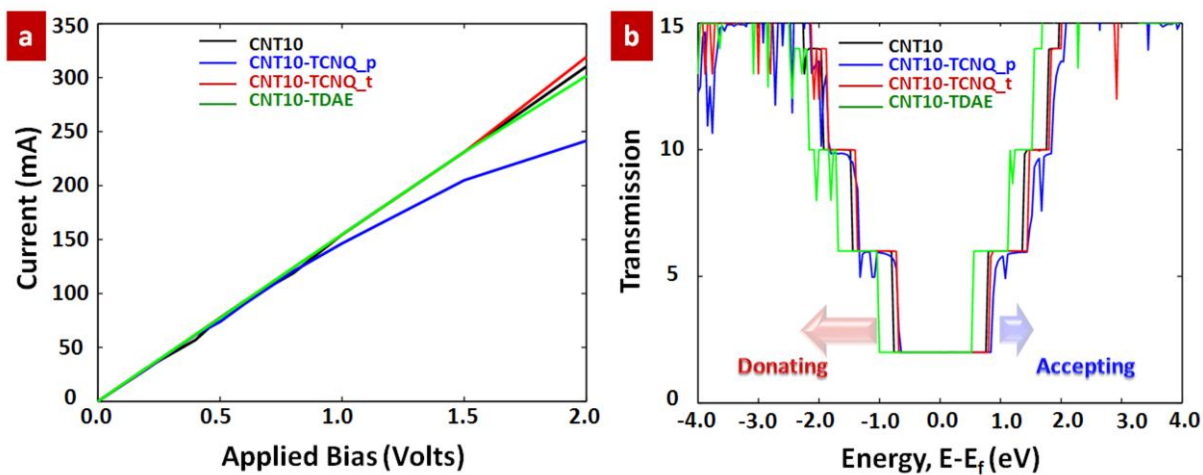

**Figure S3.** (a)  $I$ - $V$  curves and (b) the transmission curves,  $T(E, V=0)$ , of TCNQ or TDAE encapsulated CNT(10,10)s, “CNT $a$ - $b$ \_ $c$ ”, where “ $a$ ”, “ $b$ ”, and “ $c$ ” respectively mean the size of CNT, encapsulated organic molecule, and stacking pattern.

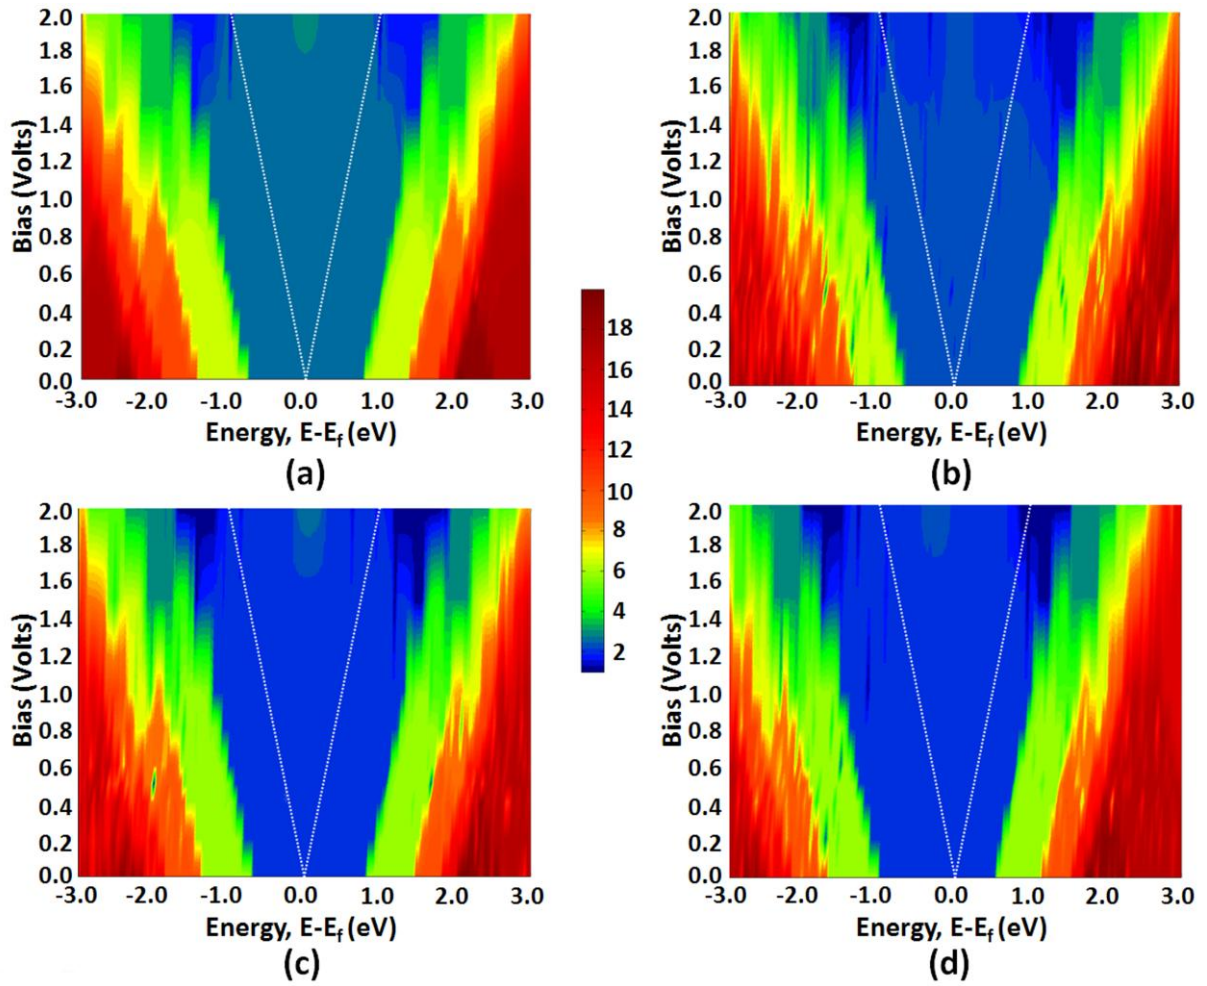

**Figure S4.** Bias dependence of the transmission curves,  $T(E,V)$ , calculated at every 0.2 bias voltage for the pure CNT(10,10) and TCNQ or TDAE encapsulated CNT10s, (a) CNT10, (b) CNT10–TCNQ\_P, (c) CNT10–TCNQ\_T, and (d) CNT10–TDAE. Dotted white lines indicate the range of current integration around the Fermi level.
